# Supplementary material for: Auditory Brainstem Responses (ABR) of Rats during Experimentally Induced Tinnitus: Literature Review
Source: Brain Sci. 2020 Nov 24;10(12):901. doi: 10.3390/brainsci10120901 (PMC7760291; doi:10.3390/brainsci10120901)
Supplement: Supplementary file 1 [file brainsci-10-00901-s001.pdf]

Supplementary Files

Table S1. Extracted data regarding tinnitus characteristics and tinnitus-relevant changes in ABR.

| Article                | Objective of the study                                                                  | Tinnitus inducing                                                     | ABR aim (amplitude, latency, thresholds)               | ABR time-point                                              | Additional drugs (side effects based on the article) | Anesthesia during ABR *during noise exposure | Additional methods applied in the study | Experimental groups        | Animals (age**, sex and strain)          | Sample size: overall /used for ABR | Changes in threshold                                         | Changes in amplitude                  | Changes in latency                                      | Link between ABR and tinnitus recognizing | Tinnitus recognizing | Tinnitus time-point                          | Tinnitus-relevant results                                                                                                                  |
|------------------------|-----------------------------------------------------------------------------------------|-----------------------------------------------------------------------|--------------------------------------------------------|-------------------------------------------------------------|------------------------------------------------------|----------------------------------------------|-----------------------------------------|----------------------------|------------------------------------------|------------------------------------|--------------------------------------------------------------|---------------------------------------|---------------------------------------------------------|-------------------------------------------|----------------------|----------------------------------------------|--------------------------------------------------------------------------------------------------------------------------------------------|
| Zhang et al. 2020 [36] | to study if loss of cochlear ribbon synapses contributes to tinnitus                    | SAL (200 mg/kg/d) for 10 consecutive days (intraperitoneal injection) | threshold, amplitude (wave I 90 dB for each frequency) | 2 hours after the last SAL administration (on the 10th day) | -                                                    | Ketamine (90 mg/kg) + Xylazine (10 mg/kg)    | ASR, IF of IHC                          | SAL (n=10), control (n=10) | 8 weeks old male Wistar rats (250-300g)* | 20/20                              | No significant differences between the SAL and control group | ↓ wave I after SAL at all frequencies | No significant difference between SAL and control group | Data not available                        | GPIAS                | after the last SAL administration            | The mean ratio was significantly lower in the treated group than in the control group, 0:5145 +/- 0:045 and 0:68 +/- 0:0466, respectively. |
| Zhang et al. 2020 [54] | to examine if sodium salicylate disrupts expression of VGLUT3 and if it may corresponds | SAL (200 mg/kg/d) for 10 consecutive days (intraperitoneal)           | threshold                                              | 2 hours after the last SAL administration (on the 10th day) | -                                                    | Chloral hydrate (6 %, 0.6 ml/100 g)          | WB, IF of cochlea                       | SAL (n=12), control (n=12) | 8 weeks old male Wistar rats (250-300g)* | 24/15                              | No significant differences between the SAL                   | Data not available                    | Data not available                                      | Data not available                        | GPIAS                | 2 h after SAL administration on the 10th day | Mean inhibitory rates differed significantly among SAL                                                                                     |



|                        |                                                                                                                                                                  |                                               |                                                                         |                                                                |                                                                                                  |                                           |               |                                                |                                                     |       |                                                                                                                                          |                                                |                                                                                                                                        |                    | correlation between wave I and hearing threshold |   |   |
|------------------------|------------------------------------------------------------------------------------------------------------------------------------------------------------------|-----------------------------------------------|-------------------------------------------------------------------------|----------------------------------------------------------------|--------------------------------------------------------------------------------------------------|-------------------------------------------|---------------|------------------------------------------------|-----------------------------------------------------|-------|------------------------------------------------------------------------------------------------------------------------------------------|------------------------------------------------|----------------------------------------------------------------------------------------------------------------------------------------|--------------------|--------------------------------------------------|---|---|
| Duron et al. 2020 [44] | to test if together with lowering ASR threshold, salicylate injection would transiently affect brainstem responses in a consistent, hyperacusis-dependent manner | SAL (150 mg/kg/d) (intraperitoneal injection) | threshold old, amplitude, latency (I-IV, 80-40 dB for each frequencies) | 0.5 hour before, 0.5, 1 and 1.5 hours after SAL administration | -                                                                                                | Ketamine (10 mg/kg) + Xylazine (20 mg/kg) | MEMR, ASR     | salicylate (n=19), control (n=18)              | 16 weeks old male Sprague-Dawley rats (250-300 g)** | 37/15 | 30 min after SAL: no differences, 60 min after SAL: ↑ at 6 kHz (+8.5 dB); at 10 kHz (+10 dB); at 12 kHz (+17.5 dB); at 16 kHz (+18.3 dB) | 90 min after SAL: ↑IV wave, ↓ I wave at 16 kHz | 60 min after SAL: ← III-IV (0.25 ms) at 6 kHz; 90 min after SAL: ← IV at 10 kHz; 60 min after SAL→I at all frequencies (except 16 kHz) | Data not available | not applied                                      | - | - |
| Lee et al. 2019 [46]   | to examine the effects of EGb 761 (EGb) on the plasticity of NMDA receptor subunit 2B (GluN2B) in IC after SAL                                                   | SAL (350 mg/kg/d) (intraperitoneal injection) | threshold old                                                           | 5 days before and 2 hours after SAL administration             | Egb 761 (a standard form of GBE) (40 mg/kg) for 5 consecutive days (orally) (data not available) | Zoletil (40 mg/kg) + Xylazine (10 mg/kg)  | WB, IHC of IC | S (n=6), Egb (n=6), S+EGb (n=6), control (n=6) | 7 weeks old male Sprague-Dawley rats                | 24/24 | After SAL: ↑ +10 dB; no significant differences among groups but it is a                                                                 | Data not available                             | Data not available                                                                                                                     | Data not available | not applied                                      | - | - |

|                                |                                                                                              |                                                                                                  |                                |                                                                                                                 |                                                                                                                              |                                                         |                                                          |                                                           |                                                                                         |                                                                                                          |                                                                                                                                                                         |                                                         |                       |                                                             |       |                                                                                                     |                                                                                                                                                                                                                                                   |
|--------------------------------|----------------------------------------------------------------------------------------------|--------------------------------------------------------------------------------------------------|--------------------------------|-----------------------------------------------------------------------------------------------------------------|------------------------------------------------------------------------------------------------------------------------------|---------------------------------------------------------|----------------------------------------------------------|-----------------------------------------------------------|-----------------------------------------------------------------------------------------|----------------------------------------------------------------------------------------------------------|-------------------------------------------------------------------------------------------------------------------------------------------------------------------------|---------------------------------------------------------|-----------------------|-------------------------------------------------------------|-------|-----------------------------------------------------------------------------------------------------|---------------------------------------------------------------------------------------------------------------------------------------------------------------------------------------------------------------------------------------------------|
| administrati<br>on             |                                                                                              |                                                                                                  |                                |                                                                                                                 |                                                                                                                              |                                                         |                                                          |                                                           |                                                                                         | tenden<br>cy to<br>higher<br>thresho<br>ld shift<br>in SAL<br>at 8<br>kHz<br>than in<br>control<br>group |                                                                                                                                                                         |                                                         |                       |                                                             |       |                                                                                                     |                                                                                                                                                                                                                                                   |
| Jang<br>et al.<br>2019<br>[45] | to study the<br>effects of<br>memantine<br>on<br>salicylate-<br>induced<br>tinnitus<br>model | SAL (400<br>mg/kg/d<br>) for 7<br>consecut<br>ive days<br>(intraper<br>itoneal<br>injection<br>) | thresh<br>old                  | before,<br>on 7 day<br>(the last<br>day of<br>SAL)<br>and on<br>day 8<br>(the first<br>day of<br>cessatio<br>n) | memantine<br>(inhibitor<br>of NMDA)<br>(5mg/kg/d)<br>for 7<br>consecutiv<br>e days<br>(injection)<br>(data not<br>available) | Data not<br>available                                   | rt-PCR,<br>IHC of<br>AC,<br>NBPIAS                       | SAL+ME<br>M (n=10),<br>SAL<br>(n=10)                      | 9<br>weeks<br>old<br>male<br>Sprag<br>ue-<br>Dawl<br>ey<br>(SD)<br>rats<br>(300<br>g)** | 20/20                                                                                                    | SAL: ↑<br>at 8<br>and 16<br>kHz<br>(about<br>+ 10<br>dB) on<br>7 and 8<br>days<br>(vs.<br>before).<br>SAL+M<br>EM: no<br>signific<br>ant<br>change<br>s (vs.<br>before) | Data<br>not<br>availab<br>le                            | Data not<br>available | Data not<br>available                                       | GPIAS | before<br>and 2h<br>after<br>each<br>SAL<br>adminis<br>tration<br>and 24h<br>post-<br>treatme<br>nt | Baseline:<br>46%<br>(control<br>group),<br>47%<br>(experim<br>ental<br>group).<br>After<br>SAL:<br>reducing<br>, lesser<br>extent in<br>the<br>group<br>treated<br>with a<br>combinat<br>ion of<br>SAL+ME<br>M (at<br>day 1,3,5<br>and 7<br>day). |
| Fang<br>et al.<br>2016<br>[53] | to study<br>tinnitus-like<br>behavior in<br>rats after<br>salicylate<br>treatment            | SAL (300<br>mg/kg/d<br>) for 4*<br>or 8<br>consecut<br>ive days                                  | amplit<br>ude<br>(III<br>wave) | before,<br>after 8<br>days<br>and 1<br>week<br>after 8                                                          | not applied                                                                                                                  | Ketamin<br>e (80<br>mg/kg)+<br>Xylazine<br>(4<br>mg/kg) | DPOAE,<br>IHC of<br>VCN,<br>Transmiss<br>ion<br>Electron | Repeated<br>injections<br>of SAL<br>(S4) (n =<br>10) or 8 | 6-8<br>weeks<br>old<br>male<br>Wista<br>r                                               | 42/6                                                                                                     | Data<br>not<br>availab<br>le                                                                                                                                            | ↓ at all<br>freque<br>ncies<br>after<br>SAL,<br>greater | Data not<br>available | When<br>GPIAS<br>disappear<br>ed,<br>amplitude<br>recovered | GPIAS | 4h after<br>the final<br>drug<br>adminis<br>tration                                                 | Inhibitio<br>n of<br>GPIAS<br>was<br>shown in<br>all                                                                                                                                                                                              |

|                                                    |                                                    |                                   |                                        |                                                                                                                  |                                       |                                                                                                                                                            |                      |                   |                                                                                                                                                                                                                                                                                                                                                                                                                               |
|----------------------------------------------------|----------------------------------------------------|-----------------------------------|----------------------------------------|------------------------------------------------------------------------------------------------------------------|---------------------------------------|------------------------------------------------------------------------------------------------------------------------------------------------------------|----------------------|-------------------|-------------------------------------------------------------------------------------------------------------------------------------------------------------------------------------------------------------------------------------------------------------------------------------------------------------------------------------------------------------------------------------------------------------------------------|
| and<br>compare<br>with<br>DPOAE and<br>ABR results | (intraper<br>itoneal<br>injection<br>) *not<br>ABR | days<br>SAL<br>adminis<br>tration | Microsco<br>py (TEM),<br>WB for<br>VPC | days<br>(n=10,<br>recovery<br>group<br>with 1<br>week<br>after 8<br>SAL<br>days(n =<br>12),<br>control<br>(n=10) | (Wis)<br>rats<br>(200-<br>280-<br>g)* | at 8<br>and 16<br>kHz<br>than at<br>24 and<br>32 kHz<br>after 8<br>days. 1<br>week<br>after<br>treatm<br>ent<br>recove<br>red to<br>baselin<br>e<br>levels | to baseline<br>level | on 4 and<br>8 day | groups<br>after<br>SAL<br>treatmen<br>t. The S4<br>group<br>showed<br>a<br>significa<br>nt<br>reductio<br>n in the<br>mean<br>percenta<br>ge of the<br>GPIAS<br>vs.<br>control<br>group at<br>16kHz.<br>The S8<br>group<br>showed<br>a<br>reductio<br>n at 12<br>kHz and<br>16 kHz<br>but not<br>at 8 kHz<br>or 20<br>kHz. The<br>recovery<br>group-<br>no<br>differenc<br>es (It<br>suggest<br>that<br>tinnitus-<br>behavior |
|----------------------------------------------------|----------------------------------------------------|-----------------------------------|----------------------------------------|------------------------------------------------------------------------------------------------------------------|---------------------------------------|------------------------------------------------------------------------------------------------------------------------------------------------------------|----------------------|-------------------|-------------------------------------------------------------------------------------------------------------------------------------------------------------------------------------------------------------------------------------------------------------------------------------------------------------------------------------------------------------------------------------------------------------------------------|

|                         |                                                                                       |                                                 |                                   |                                             |                                                                                                                                                            |                             |                                                                                                                                                                    |                                                                                                |                                            |       |                                                                   |                                                                                                                                                                                                   |                                                                  |                                                                                                                                 |                                         |                                                                                                          |
|-------------------------|---------------------------------------------------------------------------------------|-------------------------------------------------|-----------------------------------|---------------------------------------------|------------------------------------------------------------------------------------------------------------------------------------------------------------|-----------------------------|--------------------------------------------------------------------------------------------------------------------------------------------------------------------|------------------------------------------------------------------------------------------------|--------------------------------------------|-------|-------------------------------------------------------------------|---------------------------------------------------------------------------------------------------------------------------------------------------------------------------------------------------|------------------------------------------------------------------|---------------------------------------------------------------------------------------------------------------------------------|-----------------------------------------|----------------------------------------------------------------------------------------------------------|
|                         |                                                                                       |                                                 |                                   |                                             |                                                                                                                                                            |                             |                                                                                                                                                                    |                                                                                                |                                            |       |                                                                   |                                                                                                                                                                                                   |                                                                  |                                                                                                                                 |                                         | disappeared 1 week after SAL treatment).                                                                 |
| Liu and Chen, 2015 [55] | to develop an objective method for tinnitus assessment using ABR and acoustic masking | SAL (300 mg/kg/day) (intraperitoneal injection) | latency and amplitude (I-V waves) | before and 2 hours after SAL administration | vigabatrin (a GABA transaminase inhibitor) dissolved in drinking water for more than 2 weeks. For each rat 49±1.8 ml per day (orally) (data not available) | Chloral hydrate (400 mg/kg) | Diotic paradigm (forward masker and the probe were presented to both ears), dichotic paradigm (forward masker presented to one ear and the probe to the other ear) | Diotic paradigm (n=33), dichotic paradigm (n=10), standard ABR (n=11), diotic+vigabatrin (n=9) | 2-5 months old female and male Wistar rats | 69/69 | After SAL: ↑about 10-25 dB at all tested frequencies (no maskers) | Before SAL: ↓amplitude overall (diotic paradigm), no changes in dichotic paradigm; After SAL: stop decreasing, ↑ at 16,24 and 32 kHz (diotic paradigm); ↓I wave at all frequencies (all paradigm) | Overall →; ←I-II and II-IV at some high frequencies (no maskers) | After SAL treatment GPIAS was reduced at high frequencies at which the forward masker enhanced the ABR in the diotic condition. | GPIAS before and 2h after SAL injection | Reducing GPIAS at 16,24 and 32 kHz, but not at 6 and 12 kHz. Fully recovered 2 days after SAL treatment. |





|                                 |                                                                                                                                                                           |                                            |                                         |                                           |             |                                      |                             |                                                               |                                                                             |                         |                                                                                                                               |                                                                                                                                                                                                 |                                                                                                       |                       |                |   |   |
|---------------------------------|---------------------------------------------------------------------------------------------------------------------------------------------------------------------------|--------------------------------------------|-----------------------------------------|-------------------------------------------|-------------|--------------------------------------|-----------------------------|---------------------------------------------------------------|-----------------------------------------------------------------------------|-------------------------|-------------------------------------------------------------------------------------------------------------------------------|-------------------------------------------------------------------------------------------------------------------------------------------------------------------------------------------------|-------------------------------------------------------------------------------------------------------|-----------------------|----------------|---|---|
|                                 |                                                                                                                                                                           |                                            |                                         |                                           |             |                                      |                             | (SD)<br>rats                                                  |                                                                             |                         | on was<br>greater<br>than<br>2h);<br>↓wave<br>II at<br>4,16<br>and 20<br>kHz (2<br>hours,<br>1 and 3<br>days<br>after<br>SAL) |                                                                                                                                                                                                 |                                                                                                       |                       |                |   |   |
| Liu<br>and<br>Chen,<br>2012[34] | to examine<br>the effect of<br>forward<br>masking on<br>the ABR in<br>NaSal-<br>induced<br>tinnitus and<br>in the<br>presence of<br>a<br>continuous<br>background<br>tone | SAL (300<br>mg/kg/d<br>)<br>(injection)    | amplitude,<br>latency<br>(I-V<br>waves) | 2 hours<br>after<br>SAL<br>administration | not applied | Chloral<br>hydrate<br>(400<br>mg/kg) | not<br>applied              | Diotic<br>paradigm<br>(n=5),<br>dichotic<br>paradigm<br>(n=6) | 8-13<br>weeks<br>old<br>female<br>and<br>male<br>Wistar<br>(Wistar)<br>rats | 11/11                   | Data<br>not<br>available                                                                                                      | Before<br>SAL: ↓<br>at all<br>tested<br>frequencies<br>(diotic<br>paradigm).<br>After<br>SAL: stop<br>decreasing, ↑<br>at 16<br>kHz<br>(masker: 16<br>kHz,<br>55 dB<br>spl, 50<br>and 80<br>ms) | Before:<br>overall →<br>(diotic<br>paradigm)<br>; after<br>SAL: no<br>changes<br>(diotic<br>paradigm) | Data not<br>available | not<br>applied | - | - |
| Chen<br>et al.<br>2010<br>[43]  | to study<br>salicylate-<br>induced<br>tinnitus                                                                                                                            | SAL (200<br>mg/kg/d<br>) for 5<br>days per | amplitude<br>(III<br>wave)              | before, 3<br>days, 2<br>and 4<br>weeks    | not applied | Isoflurane<br>(4%)                   | CAP,<br>DPOAE,<br>hair cell | SAL 200<br>mg<br>(n=15),<br>other                             | 3<br>months<br>old<br>male                                                  | 23/6<br>(only<br>young) | Data<br>not<br>available                                                                                                      | ↓(4-32<br>kHz,<br>100<br>dB) on                                                                                                                                                                 | Data not<br>available                                                                                 | Data not<br>available | not<br>applied | - | - |







|                              |                                                                                                                                                             |                                                                                  |                                          |                                         |             |                                             |                                           |                               |                                                 |       |                                                                                                                                                           |                    |                    |                    |       |                                                                                                                                                                                                                                                          |
|------------------------------|-------------------------------------------------------------------------------------------------------------------------------------------------------------|----------------------------------------------------------------------------------|------------------------------------------|-----------------------------------------|-------------|---------------------------------------------|-------------------------------------------|-------------------------------|-------------------------------------------------|-------|-----------------------------------------------------------------------------------------------------------------------------------------------------------|--------------------|--------------------|--------------------|-------|----------------------------------------------------------------------------------------------------------------------------------------------------------------------------------------------------------------------------------------------------------|
|                              |                                                                                                                                                             |                                                                                  |                                          |                                         |             |                                             |                                           |                               |                                                 |       |                                                                                                                                                           |                    |                    |                    |       | different from the unexposed controls.                                                                                                                                                                                                                   |
| van Zwieten et al. 2019 [52] | to study the effect of high frequency stimulation (HFS) and low frequency stimulation (LFS) of the medial geniculate bodies (MGB) on noise-induced tinnitus | narrow-band noise: 16 kHz, 115 dB, 1.5 h, unilateral (contralateral ear-plugged) | threshold (to estimate hearing function) | before and 6 weeks after noise exposure | not applied | Ketamine (90 mg/kg) + Xylazine (10 mg/kg) * | Elevated Zero Maze (EZM), Open Field (OF) | Noise (n=11)                  | 11 weeks old male Sprague-Dawley rats (350 g)** | 11/11 | After noise in the ipsilateral ear ↑ at all frequencies (threshold: 70-90 dB); no differences between before and contralateral ears (threshold: 40-50 dB) | Data not available | Data not available | Data not available | GPIAS | before (with HFS and without) and 4-6 weeks after noise during HFS, post-HFS and post-LFS. All rats showed tinnitus. Only at 16 kHz (background noise) were significantly changes. (increasing noise exposure). At baseline, there was no effect of HFS. |
| van Zwieten et al. 2019 [51] | to investigate the effect of HFS of the DCN on a noise-induced tinnitus                                                                                     | narrow-band noise: 16 kHz, 115 dB, 1.5 h, unilateral (contralateral ear-plugged) | threshold                                | before and 2 weeks after noise exposure | not applied | Ketamine (90 mg/kg) + Xylazine (10 mg/kg) * | IHC of IC, AC, MGB (c-Fos)                | Noise +HFS (n=6), noise (n=5) | 11 weeks old male Sprague-Dawley rats (350 g)** | 10/10 | Before noise: 40-60 dB; after noise: ↑ in ipsilateral ears (70-100 dB); contralateral ear and                                                             | Data not available | Data not available | Data not available | GPIAS | before (with HFS and without) and 4-6 weeks after noise during HFS, post-HFS and post-LFS. GPIAS were significantly increased after noise exposure (only at 16 kHz as a background noise).                                                               |

|                        |                                                                                  |                                                                           |           |                                                     |             |                           |             |                            |                                                      |                 |                                                                                                                                                            |                    |                    |                    |       |                              |                                                                                                                                  |
|------------------------|----------------------------------------------------------------------------------|---------------------------------------------------------------------------|-----------|-----------------------------------------------------|-------------|---------------------------|-------------|----------------------------|------------------------------------------------------|-----------------|------------------------------------------------------------------------------------------------------------------------------------------------------------|--------------------|--------------------|--------------------|-------|------------------------------|----------------------------------------------------------------------------------------------------------------------------------|
|                        |                                                                                  |                                                                           |           |                                                     |             |                           |             |                            |                                                      |                 | before noise (40-50 dB)                                                                                                                                    |                    |                    |                    |       |                              | und). After noise during HFS: the gap: no-gap ratio decreased (16 kHz as a background). At baseline, there was no effect of HFS. |
| Ahsan et al. 2018 [49] | to demonstrate effects of deep brain stimulation (DBS) on noise-induced tinnitus | band noise: 8-16 kHz, 115 dB, 2 h, unilateral (contralateral ear-plugged) | threshold | before, immediately and 1 week after noise exposure | not applied | Isoflurane (2%-3%)*       | not applied | Noise (n=6), control (n=3) | 11-15 weeks old male Sprague-Dawley rats (350-450g)* | 9/6             | Before and after in contralateral ears (threshold: 20-40 dB), immediately after noise in ipsilateral ears ↑ (threshold: 50-60 dB); recovered 1 month later | Data not available | Data not available | Data not available | GAP   | after noise exposure         | 4/6 rats showed tinnitus. There was a significant difference at 12 kHz, 20 kHz, 28 kHz, and at broadband noise (BBN).            |
| Turner and Larse       | to explore the relative impacts of                                               | 1st experiment:                                                           | Threshold | before and immediately                              | not applied | Isoflurane (poor results) | not applied | 1 part: Noise (n=137),     | 5-6-months old                                       | 1st experiment: | Only noise 122 dB                                                                                                                                          | Data not           | Data not available | Data not available | GPIAS | on 1, 3, 7, 14, 21, 28 after | The 12 noise exposure                                                                                                            |

|                       |                                                                                                                             |                                                                                                                                                                            |                                                                  |                                                |                                                                                              |                                                                                   |                                                      |                                        |                                                              |                                        |                                                              |                                                                   |                    |                                                                                    |                |                                                                                                                                       |                                                                                                                                                                                                                                |
|-----------------------|-----------------------------------------------------------------------------------------------------------------------------|----------------------------------------------------------------------------------------------------------------------------------------------------------------------------|------------------------------------------------------------------|------------------------------------------------|----------------------------------------------------------------------------------------------|-----------------------------------------------------------------------------------|------------------------------------------------------|----------------------------------------|--------------------------------------------------------------|----------------------------------------|--------------------------------------------------------------|-------------------------------------------------------------------|--------------------|------------------------------------------------------------------------------------|----------------|---------------------------------------------------------------------------------------------------------------------------------------|--------------------------------------------------------------------------------------------------------------------------------------------------------------------------------------------------------------------------------|
| n, 2016 [65]          | noise exposure duration, intensity, and spectrum on developing tinnitus and hyperacusis 12 months later in middle-aged rats | narrow-band noise: 16 kHz, 110, 116 or 122 dB SPL for 0.5h, 1h or 2 h, unilateral (contralateral ear-not announced); 2nd experiment: 8 or 32 kHz or BBN at 110 dB for 0.5h | ately after noise exposure                                       |                                                | then Ketamine + Xylazine (doses-not available) *                                             |                                                                                   | control (n=30); 2 part: noise (n=48), control (n=18) | male Fischer 344/Br own Norway F1 rats | 137/137 ; 2nd experiment: 66/66                              | for 2h evoked significant V↑ at 32 kHz | available                                                    |                                                                   |                    |                                                                                    |                | noise exposure and monthly thereafter over the course of 1 y until they reached middle age at 18 months old (both part of experiment) | conditions resulted in tinnitus prevalence rates 12-month later ranging from a level similar to control controls at 11%, and up to 50%. Hyperacusis rates ranged from 7 to 33% (no significant differences vs. control group). |
| Bing et al. 2015 [33] | to understand the therapeutic potential of NMDA receptor inhibition in tinnitus therapy using                               | narrow-band noise: 10 kHz, 120 dB, 2 h, unilateral (contralateral ear-plugged)                                                                                             | threshold, amplitude (I-IV waves); corF to estimate the recovery | 6 days before and 15 days after noise exposure | 1 or 2 times of 200 μM AM-101 (NMDA receptor antagonist) 2,4 and 8 days after noise exposure | Ketamine hydrochloride (75 mg/kg) +Xylazine hydrochloride (5 mg/kg) *Medetomidine | IHC of cochlea, counting ribbon synapses             | 8 different experimental groups        | 8-12 weeks old female Wistar (Wistar-Kyoto) rats (200-300g)* | 42/42                                  | After noise ↑ at 8 kHz and higher frequencies. No difference | After noise: ↓wave I, more pronounced in rats without AM-101; ↓IV | Data not available | Animals with reduced tinnitus showed a less severe reduction of the numbers of IHC | the motor task | Calculating the delta of the tinnitus behavior as relative activity during silence 3                                                  | A little improvement in tinnitus behavior                                                                                                                                                                                      |

|                        |                                                                                                                                                                                    |                                                                                |                     |                                                       |                                                                                                        |                                                                |                 |                              |                                                       |                  |                                                                                                                                                          |                                                  |                                                                               |                    |                                   |                            |                                                                                                                                                               |
|------------------------|------------------------------------------------------------------------------------------------------------------------------------------------------------------------------------|--------------------------------------------------------------------------------|---------------------|-------------------------------------------------------|--------------------------------------------------------------------------------------------------------|----------------------------------------------------------------|-----------------|------------------------------|-------------------------------------------------------|------------------|----------------------------------------------------------------------------------------------------------------------------------------------------------|--------------------------------------------------|-------------------------------------------------------------------------------|--------------------|-----------------------------------|----------------------------|---------------------------------------------------------------------------------------------------------------------------------------------------------------|
|                        | tinnitus in a noise trauma model                                                                                                                                                   |                                                                                | ry of the ABR waves |                                                       | (applied locally to the round-window) *interference between AM-101 and ketamine                        | midine hydrochloride (0.33 mg/kg)                              |                 |                              |                                                       |                  |                                                                                                                                                          | between rats treated with AM-101 and not-treated | wave. In rats treated with AM-101 48h after noise ABR was partially conserved |                    | synaptic contacts                 |                            | and 10 days after exposure                                                                                                                                    |
| Zheng et al. 2015 [59] | to test if a combination of delta-9-tetrahydrocannabinol (delta-9-THC) and cannabidiol (CBD), delivered in a 1:1 ratio, could affect acoustic trauma-induced tinnitus in rat model | narrow-band noise: 16 kHz, 115 dB, 1 h, unilateral (contralateral ear-plugged) | threshold           | before, immediately and 6 months after noise exposure | delta-9-THC (1.5 mg/kg) and CBD (1.5 mg/kg) every day for a total of 27 days (no ABR in drugs' groups) | *Fentanyl (0.2 mg/kg) + Medetomidine hydrochloride (0.5 mg/kg) | not applied     | Noise (n=30), control (n=20) | 7-10 weeks old male Wistar (Wistar) rats (300–350 g)* | 50/50            | Immediately after noise: ↑ ipsilateral (threshold: 50-70 dB). Contralateral: no changes (threshold: 20-30 dB). 6 months after noise: recovery of the ABR | Data not available                               | Data not available                                                            | Data not available | conditioned lick suppression task | 1 month after noise trauma | 14 rats presented tinnitus. The cannabinoids significantly increased the number of tinnitus animals in the exposed-tinnitus group, but not in the sham group. |
| Zheng, McPh            | to study the effect of L-baclofen                                                                                                                                                  | narrow-band noise: 16                                                          | threshold           | before, immediately                                   | L-baclofen (5 mg/kg/d)                                                                                 | Ketamine hydrochloride                                         | IHC of cochlear | Noise (n=8), noise+L-        | 8-10 weeks old                                        | 32/mis sing data | Immediately after                                                                                                                                        | Data not                                         | Data not available                                                            | Data not available | a conditioned                     | 2 weeks and then at        | 2 and 17.5 weeks                                                                                                                                              |

|                                        |                                                                                                    |                                                                               |                                                   |                                                                                                                                                                                                                                                                |                                                                                                                                            |                 |                                                                           |                                                            |                                                                                                                                                                                                                   |               |                                 |                                                           |                                                                                                                                                                                                                                                                                                                                                                                                                                   |
|----------------------------------------|----------------------------------------------------------------------------------------------------|-------------------------------------------------------------------------------|---------------------------------------------------|----------------------------------------------------------------------------------------------------------------------------------------------------------------------------------------------------------------------------------------------------------------|--------------------------------------------------------------------------------------------------------------------------------------------|-----------------|---------------------------------------------------------------------------|------------------------------------------------------------|-------------------------------------------------------------------------------------------------------------------------------------------------------------------------------------------------------------------|---------------|---------------------------------|-----------------------------------------------------------|-----------------------------------------------------------------------------------------------------------------------------------------------------------------------------------------------------------------------------------------------------------------------------------------------------------------------------------------------------------------------------------------------------------------------------------|
| erson<br>and<br>Smith,<br>2014<br>[58] | adminitratio<br>n at early<br>time points<br>on<br>developing<br>tinnitus<br>after noise<br>trauma | kHz, 115<br>dB, 1 h,<br>unilatera<br>l<br>(contrala<br>teral ear-<br>plugged) | and 22<br>weeks<br>after<br>noise<br>exposur<br>e | 0.5h after<br>the noise<br>and then<br>again<br>every 24 h<br>for 5 days<br>and at 17.5<br>weeks<br>following<br>the noise<br>or sham<br>exposure<br>for 4.5<br>weeks<br>(3mg/kg/d)<br>*sedation<br>in response<br>to the 5-<br>mg/kg<br>dose (pilot<br>study) | oride (75<br>mg/kg) +<br>Medeto<br>midine<br>hydrochl<br>oride (0.3<br>mg/kg)<br>*Medeto<br>midine<br>hydrochl<br>oride<br>(0.33<br>mg/kg) | nucleus<br>(CN) | Baclofen<br>(n=8),<br>control<br>(n=8), L-<br>Baclofen<br>+ sham<br>(n=8) | male<br>Wista<br>r<br>(Wis)<br>rats<br>(300-<br>350<br>g)* | noise: ipsi-<br>ears<br>(thresh<br>old 50-<br>70 dB),<br>contr-<br>ears: no<br>change<br>s; 22<br>weeks<br>after in<br>both<br>ears<br>restore<br>d to<br>baselin<br>e levels<br>(tempo<br>rary<br>elevati<br>on) | availab<br>le | lick<br>suppre<br>ssion<br>task | 10 and<br>17.5<br>weeks<br>after<br>noise<br>exposur<br>e | after<br>noise<br>exposure<br>: shift of<br>the lick<br>suppress<br>ion (in<br>resposne<br>to 20-<br>kHz, but<br>not BBN<br>or 32<br>kHz).<br>Tested<br>again at<br>10 weeks<br>followin<br>g the<br>acoustic<br>trauma,<br>all three<br>stimuli<br>resulted<br>in<br>greater<br>lick<br>suppress<br>ion in<br>exposed<br>animals<br>(it<br>indicated<br>the<br>presence<br>of<br>tinnitus<br>at<br>multiple<br>frequenc<br>ies). |
|----------------------------------------|----------------------------------------------------------------------------------------------------|-------------------------------------------------------------------------------|---------------------------------------------------|----------------------------------------------------------------------------------------------------------------------------------------------------------------------------------------------------------------------------------------------------------------|--------------------------------------------------------------------------------------------------------------------------------------------|-----------------|---------------------------------------------------------------------------|------------------------------------------------------------|-------------------------------------------------------------------------------------------------------------------------------------------------------------------------------------------------------------------|---------------|---------------------------------|-----------------------------------------------------------|-----------------------------------------------------------------------------------------------------------------------------------------------------------------------------------------------------------------------------------------------------------------------------------------------------------------------------------------------------------------------------------------------------------------------------------|

|                             |                                                                                                                   |                                                                                   |                                                                    |                                                                                      |             |                                                                    |              |                                        |                                                      |                       |                                                                                                                                                                                                                      |                    |                    |                    |       |                                                              |                                                                                                                                                                                         |
|-----------------------------|-------------------------------------------------------------------------------------------------------------------|-----------------------------------------------------------------------------------|--------------------------------------------------------------------|--------------------------------------------------------------------------------------|-------------|--------------------------------------------------------------------|--------------|----------------------------------------|------------------------------------------------------|-----------------------|----------------------------------------------------------------------------------------------------------------------------------------------------------------------------------------------------------------------|--------------------|--------------------|--------------------|-------|--------------------------------------------------------------|-----------------------------------------------------------------------------------------------------------------------------------------------------------------------------------------|
| Laundrie and Sun, 2014 [38] | to investigate the link between the onset of the changes in central auditory system and the onset of the tinnitus | narrow-band noise: 12 kHz, 120 dB SPL, 1h, unilateral (contralateral ear-plugged) | threshold (to assess the degree of the noise-induced hearing loss) | 5-6 hours after noise exposure and daily until rat had recovered to its full ability | not applied | Isoflurane (1-2%)*                                                 | AC recording | Noise (n=3)                            | 3-4 months old male Harlan Sprague-Dawley (HSD) rats | 3/3                   | Before noise: 20 dB; 2h after noise: ipsi-ears ↑ at 12 kHz (+ 30-45 dB), contri-ears (+ <10 dB) at 12 kHz . All rats developed either permanent (>2 weeks) or temporary (<3 days) hearing loss in the exposed ear(s) | Data not available | Data not available | Data not available | GPIAS | before and 4h after noise exposure                           | 4h after noise: GPIAS decreased to 31% at 6 kHz, 28% at 12 kHz, 36% at 16 kHz*, and 42% at 20 kHz*. Reduction remained constant (~ 15% decrease compared to pre-exposure). *significant |
| Ropp et al. 2014 [39]       | to study the long-term effects of sound-induced cochlear trauma on spontaneous discharge                          | narrow-band noise: 16 kHz, 116 dB SPL, 2h, unilateral (contralateral ear-plugged) | threshold                                                          | before and 1 week after noise exposure                                               | not applied | Ketamine (40 mg/kg)+ Xylazine (10 mg/kg) *un anesthetized (rat was | IC recording | Noise, control (not clearly announced) | adult male Sprague-Dawley (SD) rats                  | not clearly announced | After noise: ↑ at 10-40 kHz (variable patterns of change)                                                                                                                                                            | Data not available | Data not available | Data not available | GPIAS | before and at various delays after sound exposure (2-3 times | GPIAS scores returned to normal baselines in the weeks immediately                                                                                                                      |

|                           |                                                                                     |                                                              |                                                |                                                                      |             |                                                         |                                                       |                                                                |                                            |                             |                                                                 |                                                   |                          |                                                                                                                                                                                                                          |                |                                                             |                                                                              |
|---------------------------|-------------------------------------------------------------------------------------|--------------------------------------------------------------|------------------------------------------------|----------------------------------------------------------------------|-------------|---------------------------------------------------------|-------------------------------------------------------|----------------------------------------------------------------|--------------------------------------------|-----------------------------|-----------------------------------------------------------------|---------------------------------------------------|--------------------------|--------------------------------------------------------------------------------------------------------------------------------------------------------------------------------------------------------------------------|----------------|-------------------------------------------------------------|------------------------------------------------------------------------------|
|                           | rates in the central nucleus of the inferior colliculus (IC)                        | teral ear-plugged)                                           |                                                |                                                                      |             | held in a slowly rotating hardware cloth cage)          |                                                       |                                                                |                                            | ng); contr-ears-no change s |                                                                 |                                                   | per week for 1-4 months) | tely following sound exposure . Unilateral threshold shifts did not strongly influence GPIAS. The GPIAS profile did not deviate from pre-exposure baselines when the rat was tested 4 and 9 weeks after sound exposure . |                |                                                             |                                                                              |
| Ruttiger et al. 2013 [60] | to identify a tinnitus-specific difference between equally exposed animals with and | narrow-band noise: 10 kHz, 120 dB SPL, 1h or 1.5 h, binaural | amplitude (click, 90 dB SPL), threshold (corF) | 6 days after noise exposure (group 1h), 30 days after noise exposure | not applied | Ketamine (75 mg/kg) + Xylazine hydrochloride (5 mg/kg)* | IHC of AC and cochlea (Arc, synapses), ribbons counts | noise 1h (data not available), 1.5h noise (data not available) | 8-12 weeks old female Wistar (Wistar) rats | 32/32                       | After noise: ↑in all groups. The group of tinnitus rats exposed | ↓ overall (corF); a reduced recovery for tinnitus | Data not available       | IHCs ribbon loss (deafferentation) did not lead to tinnitus when ABRs were                                                                                                                                               | the motor task | before and at 6 day (1 h) or 30 days (1.5 h) after exposure | 5 of 15 rats and 5 of 17 rats for the 1 h and 1.5 h exposure had developed a |

|                                  |                    |                 |                                                                                                                                                                                                                                                                                                                                                                                            |                                                                                                 |                                                                                                                                                                                                      |                                                                                      |
|----------------------------------|--------------------|-----------------|--------------------------------------------------------------------------------------------------------------------------------------------------------------------------------------------------------------------------------------------------------------------------------------------------------------------------------------------------------------------------------------------|-------------------------------------------------------------------------------------------------|------------------------------------------------------------------------------------------------------------------------------------------------------------------------------------------------------|--------------------------------------------------------------------------------------|
| without<br>tinnitus<br>using ABR | e (group<br>1.5 h) | (200-<br>300g)* | d to 1h<br>had a<br>signific<br>antly<br>larger<br>hearing<br>loss<br>than<br>no-<br>tinnitus<br>rats.<br>Hearin<br>g loss<br>for<br>frequen<br>cies<br>above<br>11.3<br>kHz<br>was<br>signific<br>antly<br>increas<br>ed<br>compar<br>ed to<br>no-<br>tinnitus<br>groups.<br>After<br>the<br>more<br>intense<br>noise<br>exposu<br>re (1.5<br>h),<br>thresho<br>ld loss<br>in<br>tinnitus | animal<br>s in<br>compa<br>rison<br>to<br>tinnitu<br>s-free<br>animal<br>s was<br>observ<br>ed. | restored<br>and Arc<br>was<br>mobilized<br>in the AC.<br>When<br>brainstem<br>responses<br>remain<br>reduced<br>and Arc<br>was not<br>mobilized,<br>IHC<br>ribbon<br>loss<br>resulted in<br>tinnitus | significa<br>ntly<br>elevated<br>silence<br>activity,<br>indicatin<br>g<br>tinnitus. |
|----------------------------------|--------------------|-----------------|--------------------------------------------------------------------------------------------------------------------------------------------------------------------------------------------------------------------------------------------------------------------------------------------------------------------------------------------------------------------------------------------|-------------------------------------------------------------------------------------------------|------------------------------------------------------------------------------------------------------------------------------------------------------------------------------------------------------|--------------------------------------------------------------------------------------|

|                           |                                                                                                                                 |                                                                                                                                 |           |                                        |             |                                          |                                                   |                                            |                                            |       |                                                                     |                                                                                                                                                                                      |                    |                    |                                                                   |       |                                                                                |                                                                                                                                                                                                       |
|---------------------------|---------------------------------------------------------------------------------------------------------------------------------|---------------------------------------------------------------------------------------------------------------------------------|-----------|----------------------------------------|-------------|------------------------------------------|---------------------------------------------------|--------------------------------------------|--------------------------------------------|-------|---------------------------------------------------------------------|--------------------------------------------------------------------------------------------------------------------------------------------------------------------------------------|--------------------|--------------------|-------------------------------------------------------------------|-------|--------------------------------------------------------------------------------|-------------------------------------------------------------------------------------------------------------------------------------------------------------------------------------------------------|
| Pace and Zhang, 2013 [64] | to study the effect of intense tone-induced tinnitus, and hyperacusis-like behavior on spatial learning and memory, and anxiety | narrow-band noise: 10 kHz, 118–120 dB peSPL, 2 h; 5 weeks later the 2nd exposure for 3 h unilateral (contralateral ear-plugged) | threshold | 1 and 8 weeks after 2nd noise exposure | not applied | Isoflurane (5%)* 2nd noise: during awake | elevated plus maze (EPM), Morris Water Maze (MWM) | Noise (n=8), control (n=7), excluded (n=4) | 2-2.5 months old male Long-Evans (LE) rats | 29/25 | animals was also significantly greater for low stimulus frequencies | After noise: click-no changes; 1 and 8 weeks after: ↑ at 8-28 kHz(rats with tinnitus) 12-28 kHz (rats without tinnitus) in ipsi-ears. Click-no changes. Rats with tinnitus presented | Data not available | Data not available | No special link between ABR in tinnitus groups and GPIAS results. | GPIAS | before and at 1 day after 2 times a week till 6 weeks post-the second exposure | 12/18 rats presented tinnitus (post-exposure GPIAS ratios that were both significantly higher than pre-exposure GPIAS ratios and were not significantly lower than post-exposure startle only ratios) |
|---------------------------|---------------------------------------------------------------------------------------------------------------------------------|---------------------------------------------------------------------------------------------------------------------------------|-----------|----------------------------------------|-------------|------------------------------------------|---------------------------------------------------|--------------------------------------------|--------------------------------------------|-------|---------------------------------------------------------------------|--------------------------------------------------------------------------------------------------------------------------------------------------------------------------------------|--------------------|--------------------|-------------------------------------------------------------------|-------|--------------------------------------------------------------------------------|-------------------------------------------------------------------------------------------------------------------------------------------------------------------------------------------------------|



|                           |                                                                                                                         |                                                                                |           |                                             |                                            |                                                             |                  |                                              |                                        |              |                                                                                                                                                        |                    |                    |                    |                                    |                                       |                                                                                                                                                                                                                     |
|---------------------------|-------------------------------------------------------------------------------------------------------------------------|--------------------------------------------------------------------------------|-----------|---------------------------------------------|--------------------------------------------|-------------------------------------------------------------|------------------|----------------------------------------------|----------------------------------------|--------------|--------------------------------------------------------------------------------------------------------------------------------------------------------|--------------------|--------------------|--------------------|------------------------------------|---------------------------------------|---------------------------------------------------------------------------------------------------------------------------------------------------------------------------------------------------------------------|
|                           |                                                                                                                         |                                                                                |           |                                             |                                            |                                                             |                  |                                              |                                        |              |                                                                                                                                                        |                    |                    |                    |                                    |                                       | and Arc is mobilized, tinnitus does not occur.                                                                                                                                                                      |
| Brozoski et al. 2012 [63] | to test the hypothesis that the DCN serves as a necessary trigger zone for the pathological cascade leading to tinnitus | narrow-band noise: 16 kHz, 116 dB, 1 h, unilateral (contralateral ear-plugged) | threshold | before and immediately after noise exposure | not applied                                | Data not available<br>*Isoflurane (dose-data not available) | histology of DCN | noise (n=23), control (n=23), excluded (n=2) | 3 months old male long-Evans (LE) rats | 48/46        | Immediately after noise: ↑ in ipsi-ears (+30 to 50 dB); contr-ears no changes. No significant differences between animals with and without DCN lesions | Data not available | Data not available | Data not available | an operant conditioned-suppression | immediately after the acoustic trauma | Significant evidence of tinnitus appeared at 20 kHz in the exposed DCN-intact animals. The exposed animals showed a frequency-specific downshift in their discrimination functions, compared to unexposed controls. |
|                           |                                                                                                                         |                                                                                |           |                                             |                                            |                                                             |                  |                                              |                                        |              |                                                                                                                                                        |                    |                    |                    |                                    |                                       |                                                                                                                                                                                                                     |
| Zheng et al. 2012 [70]    | to investigate the effects of memantine                                                                                 | narrow-band noise: 16 kHz, 110                                                 | threshold | before, immediately and 3                   | memantine : 5 mg/kg (injection) (no ABR in | Ketamine hydrochloride (75                                  | not applied      | Noise (n=8), control (n=8)                   | 8-10 weeks old male                    | 16/ data not | immediately after noise: ↑                                                                                                                             | Data not available | Data not available | Data not available | a conditioned lick                 | after the noise trauma                | 5/8 rats after noise exhibited                                                                                                                                                                                      |

|              |                                                                         |                                                 |                             |                      |                                                  |                        |             |              |                          |           |                                                                                                    |                    |                    |                    |                  |                                                                                                                                                                                                                                                                                |
|--------------|-------------------------------------------------------------------------|-------------------------------------------------|-----------------------------|----------------------|--------------------------------------------------|------------------------|-------------|--------------|--------------------------|-----------|----------------------------------------------------------------------------------------------------|--------------------|--------------------|--------------------|------------------|--------------------------------------------------------------------------------------------------------------------------------------------------------------------------------------------------------------------------------------------------------------------------------|
| Zheng et al. | on the behavioral manifestations of tinnitus induced by acoustic trauma | dB, 1 h, unilateral (contralateral ear-plugged) | months after noise exposure | drug groups)         | mg/kg) + Medetomidine hydrochloride (0.3 mg/kg)* |                        |             |              | Wistar rats (300-350 g)* | available | at 16 and 20 kHz, contralateral ears no change s. 3 months after: no differences vs. Control group |                    |                    |                    | suppression task | tinnitus but acoustic trauma did not produce significantly more lick suppression than the control animals to the 20 kHz tones. A 5-mg/kg dose of memantine significantly reduced the proportion of these animals which exhibited tinnitus-like behavior (2/5 compared to 5/5). |
|              | to investigate the potential                                            | narrow-band noise: 16                           | threshold                   | before and immediate | L-baclofen (1,3 or 5 mg/kg) 1 h                  | Ketamine hydrochloride | not applied | Noise (n=8), | 8-10 weeks old           | 16/16     | After noise: ipsilateral                                                                           | Data not available | Data not available | Data not available | a conditioned    | before and 2 weeks                                                                                                                                                                                                                                                             |

|                        |                                                                       |                                                                               |           |                                             |                                                                               |                                                                             |                  |                              |                                           |       |                                                                              |                    |                    |                    |                                     |                                                 |                                                                                                                                      |
|------------------------|-----------------------------------------------------------------------|-------------------------------------------------------------------------------|-----------|---------------------------------------------|-------------------------------------------------------------------------------|-----------------------------------------------------------------------------|------------------|------------------------------|-------------------------------------------|-------|------------------------------------------------------------------------------|--------------------|--------------------|--------------------|-------------------------------------|-------------------------------------------------|--------------------------------------------------------------------------------------------------------------------------------------|
| 2012<br>[57]           | of L-baclofen to treat tinnitus using an acoustic trauma animal model | kHz, 110 dB, 1 h unilateral (contralateral ear plugged)                       |           | ately after noise exposure                  | before tinnitus test injection (no ABR in drugs' groups) (data not available) | oride (75 mg/kg) + Medetomidine hydrochloride (0.3 mg/kg)*                  |                  | control (n=8)                | male Wistar rats (300-350 g)*             |       | ears ↑across all of the frequencies; contr-ears: no changes                  | availab le         |                    |                    | lick suppression task               | after noise exposure                            | downward shift in the suppression ratio in tinnitus rats vs. control (in response to the 20 kHz tones but not to the BBN or 10 kHz). |
| Zheng et al. 2011 [56] | to study the effect of noise-induced tinnitus on spatial performance  | narrow-band noise: 16 kHz, 110 dB, 1 h unilateral (contralateral ear plugged) | threshold | before and immediately after noise exposure | not applied                                                                   | Ketamine hydrochloride (75 mg/kg) + Medetomidine hydrochloride (0.3 mg/kg)* | T-maze task test | Noise (n=8), control (n=8)   | 8 weeks old male Wistar rats (250-300 g)* | 16/16 | ↑in the exposed ears across all of the frequencies, no changes in contr-ears | Data not available | Data not available | Data not available | a conditioned lick suppression task | 2 weeks and 10 months after the acoustic trauma | 2 weeks and 10 months after noise there was a significant downward shift during 20 kHz tone but not for 10 kHz and BBN presentation. |
| Wang et al. 2009 [66]  | to study the GlyR and gephyrin message                                | narrow-band noise: 17 kHz, 116                                                | threshold | before, immediately and 16                  | not applied                                                                   | Ketamine hydrochloride (50                                                  | IHC of DCN       | Noise (n=14), control (n=15) | 3-4 months old male                       | 42/42 | immediately after noise:                                                     | Data not available | Data not available | Data not available | GAP                                 | 20 days after sound exposure                    | 10/14 sound-exposed rats                                                                                                             |

|                  |                                                                             |                                                                     |                                                       |                                         |             |                                                                                  |                                                                                   |                                              |                                              |                                                                                                                            |                                                                                                                                                                                                                                                             |                                |                                                                                              |                                                                            |                                                                                                                                                                   |
|------------------|-----------------------------------------------------------------------------|---------------------------------------------------------------------|-------------------------------------------------------|-----------------------------------------|-------------|----------------------------------------------------------------------------------|-----------------------------------------------------------------------------------|----------------------------------------------|----------------------------------------------|----------------------------------------------------------------------------------------------------------------------------|-------------------------------------------------------------------------------------------------------------------------------------------------------------------------------------------------------------------------------------------------------------|--------------------------------|----------------------------------------------------------------------------------------------|----------------------------------------------------------------------------|-------------------------------------------------------------------------------------------------------------------------------------------------------------------|
|                  | and protein levels 16 weeks following a 1-hour sound-exposure in adult rats | dB SPL, 1h, unilateral (contralateral ear plugged)                  |                                                       | weeks after noise exposure              |             | mg/kg) + Xylazine (9 mg/kg)*                                                     |                                                                                   | Fischer Brown Norway (FBN) rats              |                                              | ↑in exposed ears, recovered to baseline level at 16 weeks after noise exposure; contralateral ears (no changes vs. before) |                                                                                                                                                                                                                                                             | e every 2 weeks up to 16 weeks | showed significantly worse gap detection at 24 and 32 kHz 16 weeks following sound exposure. |                                                                            |                                                                                                                                                                   |
| Ouyang 2017 [42] | to study the mechanism of blast-induced tinnitus                            | blast exposure (194 dB SPL), unilateral (contralateral ear plugged) | threshold, amplitude (I wave at 28 kHz, 50-80 dB SPL) | before and 5 weeks after blast exposure | not applied | Isoflurane (5%)<br>*Isoflurane (4%) or Ketamine (100 mg/kg)+ Xylazine (10 mg/kg) | Elevated Plus Maze (EPM), Morris Water Maze (MWM), Manganese-enhanced MRI (MEMRI) | Blast (n=13), control (n=6), excluded (n=11) | 60-70-days old male Sprague-Dawley (SD) rats | 30/30                                                                                                                      | ↓ wave I in ipsilateral ear after blast-exposure (across most intensities) in tinnitus(+) and tinnitus(-) rats compared to controls.<br><br>5 weeks after blast-exposure no differences vs. pre-exposure (recovery). Anesthesia did not differ the results. | Data not available             | Data not available                                                                           | GPIAS<br><br>before (3 times/week) and after (2 times/week) blast exposure | 8/13 showed tinnitus. Gap-detection deficits occurred through five weeks post-blast at a frequency range of 10–28 kHz, although the 26–28 kHz region was the most |



|            |                    |                         |           |                    |             |                       |     |              |                |      |                                                                                                                                                                                                                  |          |                    |                    |       |                       |                    |                                                                                                                                                                                                                                                                                                 |
|------------|--------------------|-------------------------|-----------|--------------------|-------------|-----------------------|-----|--------------|----------------|------|------------------------------------------------------------------------------------------------------------------------------------------------------------------------------------------------------------------|----------|--------------------|--------------------|-------|-----------------------|--------------------|-------------------------------------------------------------------------------------------------------------------------------------------------------------------------------------------------------------------------------------------------------------------------------------------------|
|            |                    |                         |           |                    |             |                       |     |              |                |      | 16-28 kHz (ipsi-ears), untreated rats: ↑ at 16-28 kHz (ipsi-ears). From 3 to 6 weeks threshold shifts remained stable. At 6 weeks post blast+ sildenafil ↑ from 8 to 28 kHz, in blast group: ↑ from 16 to 28 kHz |          |                    |                    |       |                       |                    | worse PPI ratios at 6–12, 18–20, and BBN compared to rats (sildenafil+ blast). It implies stronger tinnitus at those frequencies for those groups, respectively. Worse PPI performance at several frequencies in the rats (only blast) indicated greater overall hearing impairment post-blast. |
| Mao et al. | to investigate the | a single blast exposure | threshold | before and 1,14,28 | not applied | Ketamine (100 mg/kg)+ | MRI | Blast (n=7), | 60-70-days old | 10/7 | Before blast: mean                                                                                                                                                                                               | Data not | Data not available | Data not available | GPIAS | before and 1, 14, 28, | 1 day after blast: |                                                                                                                                                                                                                                                                                                 |

|              |                                                                                                            |                                  |                                  |                      |            |                               |                                                                                                                                                                |           |                                  |                                                                                                                                                                                                                                                                                        |
|--------------|------------------------------------------------------------------------------------------------------------|----------------------------------|----------------------------------|----------------------|------------|-------------------------------|----------------------------------------------------------------------------------------------------------------------------------------------------------------|-----------|----------------------------------|----------------------------------------------------------------------------------------------------------------------------------------------------------------------------------------------------------------------------------------------------------------------------------------|
| 2012<br>[41] | underlying mechanisms of blast-induced tinnitus, hearing loss, and associated traumatic brain injury (TBI) | (10 msec, 194 dB SPL ) bilateral | and 90 days after blast exposure | Xylazine (10 mg/kg)* | died (n=3) | male Sprague-Dawley (SD) rats | 38.57 dB; 1 day after blast exposure: ↑(mean threshold: 61.57 dB); on 14, 28 and 90 days after blast recovered to 37.86 dB SPL, 30.71 dB SPL, and 27.86 dB SPL | available | and 90 days after blast exposure | GPIAS values significantly higher. GPIAS values showed a trend of increase at 22–24 kHz. Blast exposure also caused significant impairment in PPI. On post-blast day 14, significant GPIAS impairments only occurred at 28–30 kHz and BBN (higher-frequency regions) . PPI impairments |
|--------------|------------------------------------------------------------------------------------------------------------|----------------------------------|----------------------------------|----------------------|------------|-------------------------------|----------------------------------------------------------------------------------------------------------------------------------------------------------------|-----------|----------------------------------|----------------------------------------------------------------------------------------------------------------------------------------------------------------------------------------------------------------------------------------------------------------------------------------|

were  
maintain  
ed  
at 18–20  
kHz , 22–  
24 kHz  
, and  
BBN .  
On post-  
blast  
days 28  
and 90,  
GPIAS  
recover  
to pre-  
blast  
baseline  
levels at  
all the  
frequenc  
y  
bands  
tested.  
PPI was  
not  
impaired  
at 28–30  
kHz.

**Abbreviations:** ↓, reduced; ↑, increased; -, no changes; →, prolonged; ←, reduced; VGLUT3, vesicular glutamate transporter 3; GAD, glutamic acid decarboxylase; HFS, high-frequency stimulation; LFS, low frequency stimulation; AC, auditory cortex; IC, Inferior Colliculus; NMDA, The N-methyl-D-aspartate receptor; WB,, Western Blot; DCN, Dorsal Cochlea Nuclei; IF, Immunofluorescence; HL, hearing loss; SAL, sodium salicylate; AEP, auditory evoked potentials; GPIAS, Gap pre-pulse inhibition of the acoustic startle reflex; IHC, immunohistochemistry; DEX, dexamethasone, MEM, memantine; NBPIAS, Noise burst prepulse inhibition of the acoustic startle reflex; COX-2, Cyclooxygenase-2; S4, 4 days; S8, eight days; MEMR, Middle ear muscle reflex; ASR, acoustic startle response; EPM, elevated plus maze; MWM, Morris Water Maze; TEM, Transmission Electron Microscopy; VCN, Ventral Cochlea Nuclei; Wis, Wistar rats; SD, Sprague-Dawley rats; LE, Long-Evans; ipsi, ipsilateral; contr, contralateral; MEMRI, Manganese-enhanced MRI; \*Age was calculated based on the animals weight (<https://www.criver.com/products-services/find-model/wistar-igs-rat?region=23>); \*\*Age was calculated based on. the animals weight (<https://www.taconic.com/rat-model/sprague-dawley>); \*\*\* age at the beginning of experiments.

**Table S2.** Extracted data regarding ABR.

| Article                    | ABR System | Speaker (plugged into the ear canal or open field) | Type/ Duration                 | Rate               | Intensity (decreeents) | Frequency                       | Polarity           | Repetitions per recording | Filters (notch filter)                     | Electrodes placement                                              | Additional information                                                                                                  |
|----------------------------|------------|----------------------------------------------------|--------------------------------|--------------------|------------------------|---------------------------------|--------------------|---------------------------|--------------------------------------------|-------------------------------------------------------------------|-------------------------------------------------------------------------------------------------------------------------|
| Zhang et al. 2020 [36]     | TDT        | Data not available                                 | Data not available             | Data not available | Data not available     | 2, 4, 8, 12, 16, 20, and 24 kHz | Data not available | Data not available        | Data not available                         | 3: vertex (active), ipsi and contr-pinnaas (reference and ground) | Data not available                                                                                                      |
| Zhang et al. 2020 [54]     | TDT        | directly to ear canal                              | tone burst/ 5 ms (2-1-2)       | 21/s               | 90-20 dB SPL (in 5 dB) | 2, 4, 8, 12, 16, 20, and 24 kHz | Data not available | Data not available        | Data not available                         | 3: vertex (active), ipsi and contr-pinnaas (reference and ground) | Data not available                                                                                                      |
| Castañeda et al. 2019 [37] | IHS        | directly to ear canal                              | tone burst/ 5 ms (2-1-2)       | 21/s               | 80-0 dB SPL (in 10 dB) | 4, 8, 16, 24, and 32 kHz        | Data not available | 1024                      | HP-30 Hz, LP-3000 Hz (data not available)  | 4: vertex (active), pinna (references), back (ground)             | maintaining body temperature at $37.5 \pm 1$ °C (non electrical heating pad), electrode impedance ranged between 1-3 kΩ |
| Duron et al. 2020 [44]     | TDT        | directly to ear canal                              | tone burst/ 6 ms (1-4-1)       | 17/s               | 80-0 dB SPL (in 10 dB) | 6, 10, 12 and 16 kHz            | Data not available | 200                       | Data not available                         | 3: vertex (active), mastoid (reference), back (ground)            | Data not available                                                                                                      |
| Lee et al. 2019 [46]       | IHS        | Data not available                                 | tone burst/ data not available | 21/s               | 90-10 dB SPL (in 5 dB) | 8, 16, and 32 kHz               | Data not available | 512                       | HP-100 Hz, LP-1500 Hz (data not available) | 3: vertex (active), ipsi and contra-ears (reference and ground)   | The resistance between each electrode and the ground electrode <2 kΩ                                                    |
| Jang et al. 2019 [45]      | TDT        | directly to ear canal                              | tone burst/ 5 ms (2-1-2)       | 50/s               | 90-0 dB SPL (in 10 dB) | 8 and 16 kHz                    | Data not available | 512                       | HP-100 Hz, LP-3000 Hz (data not available) | 2: vertex (active), occiput (reference)                           | Data not available                                                                                                      |
| Fang et al. 2016 [53]      | TDT        | directly to ear                                    | tone burst/ 5 ms (1-3-1)       | 21/s               | 70 dB SPL              | 8,16,24 and 32 kHz              | Data not available | 500                       | Data not available                         | 3: the mastoid (active), apex nasi (reference), vertex (ground)   | temperature was maintained at 25 °C in a sound-proof room                                                               |
| Liu and Chen, 2015 [55]    | TDT        | directly to ear                                    | tone burst/ 5 ms (2-1-2)       | Data not available | 70 dB SPL              | 6, 12, 16, 24 and 32 kHz        | Data not available | 200                       | HP-300 Hz, LP-3000 Hz (50 Hz)              | 4: vertex (active), mastoids (references),                        | The resistance between each electrode and the                                                                           |

|                           |             |                                 |                                        |                    |                                            |                                  |                    |       |                                             |                                                                       |                                                                      |
|---------------------------|-------------|---------------------------------|----------------------------------------|--------------------|--------------------------------------------|----------------------------------|--------------------|-------|---------------------------------------------|-----------------------------------------------------------------------|----------------------------------------------------------------------|
|                           |             |                                 |                                        |                    |                                            |                                  |                    |       |                                             | nose tip (ground)                                                     | ground electrode <1 kΩ                                               |
| Ralli et al. 2014 [47]    | TDT         | an open field: 1 cm from ear    | tone burst/ data not available         | 10/s               | 100-0 dB SPL (in 10 dB)                    | 6,12,16,24 and 32 kHz            | Data not available | >1000 | HP-100 Hz, LP-3000 Hz (data not available)  | 3: vertex (active), ipsi and contr-pinnae (reference and ground)      | Data not available                                                   |
| Sawka and Wei, 2014 [48]  | TDT         | close to ear                    | tone burst/ 4 ms ( data not available) | 19/s               | 90 dB                                      | 4,8,12,16 and 20 kHz             | alternating        | 512   | HP-100 Hz, LP-3000 Hz (60 Hz)               | atypical, AC electrodes were used                                     | Data not available                                                   |
| Liu and Chen, 2012 [34]   | TDT         | open field: 10 cm from ears     | tone burst/ 5 ms (2-1-2)               | Data not available | 50 dB SPL (masker) 70 dB SPL               | 6, 12 and 16 kHz                 | Data not available | 200   | HP-300 Hz, LP-3000 Hz (50 Hz)               | 3: vertex (active), mastoid (reference), nose tip (ground)            | The resistance between each electrode and the ground electrode <1 kΩ |
| Chen et al. 2010 [43]     | TDT         | directly to ear                 | tone burst/ 5 ms (1-3-1)               | 21/s               | 100 dB SPL; 100-20 dB SPL (only at 12 kHz) | 4, 8, 12, 16, 20 and 32 kHz      | alternating        | 600   | HP-10 Hz, LP-3000 Hz (60 Hz)                | 3: vertex (active), mastoid (reference), behind the shoulder (ground) | maintaining body temperature at 37°C (warm blanket)                  |
| Ralli et al. 2010 [31]    | TDT         | open field (data not available) | tone burst/ 5 ms (2-1-2)               | 21/s               | 100-0 dB SPL (in 10 dB)                    | 6, 12, 16, 24 and 32 kHz         | Data not available | 1000  | HP-100 Hz, LP-3000 Hz (data not available)  | 3: vertex (reference), ipsi and contr-pinnae (active, ground)         | Data not available                                                   |
| Bauer et al. 2000 [61]    | TDT         | Data not available              | click and tone burst/3 ms (1-1-1)      | 10/s               | Data not available                         | 4, 10, 15, 20 and 31.5 kHz       | alternating        | 512   | HP-300 Hz, LP-10000 Hz (Data not available) | 3: vertex (active), nose (reference), neck (ground)                   | Data not available                                                   |
| Kim et al. 2020 [50]      | TDT         | Data not available              | tone burst/ 5 ms (1-3-1)               | 11.1/s             | (in 5 dB)                                  | 8,16 and 32 kHz                  | Data not available | 512   | Data not available                          | 3: vertex (active), mastoid (reference), neck (ground)                | Data not available                                                   |
| Brozoski et al. 2019 [62] | TDT and IHS | directly to ear canal           | tone burst/ 5 ms (2.5-0-2.5)           | 20/s               | 95-5 db SPL (in 10 dB)                     | 8, 10, 12, 16, 20, 24 and 32 kHz | Data not available | 256   | Data not available                          | 3: vertex (active), bulla (reference), hind leg (ground)              | Data not available                                                   |

|                                       |                    |                                 |                                                  |                    |                             |                                  |                    |                    |                                            |                                                                                      |                    |
|---------------------------------------|--------------------|---------------------------------|--------------------------------------------------|--------------------|-----------------------------|----------------------------------|--------------------|--------------------|--------------------------------------------|--------------------------------------------------------------------------------------|--------------------|
| van Zwieten et al. 2019 [52]          | Data not available | directly to ear canal           | tone burst/ 5 ms (2-1-2)                         | 50/s               | 110- 0 dB peSPL (in 10 dB)  | 10, 12, 16, 20, 24, and 32 kHz   | Data not available | 1000               | HP-300 Hz, LP-3000 Hz (data not available) | 3: head- permanent electrodes (reference and active), hind paw (ground)              | Data not available |
| van Zwieten et al. 2019 [51]          | Data not available | directly to ear canal           | tone burst/ 5 ms (2-1-2)                         | 50/s               | 110- 0 dB peSPL (in 10 dB)  | 10, 12, 16, 20, 24, and 32 kHz   | Data not available | 1000               | HP-300 Hz, LP-3000 Hz (data not available) | 3: head- permanent electrodes (reference and active), hind paw (ground)              | Data not available |
| Ahsan et al. 2018 [49]                | TDT                | Data not available              | click and tone burst/ 10 ms (0.5-9-0.5)          | Data not available | 100-5 dB peSPL (in 5 dB)    | 4, 8, 10, 16, 20, 24 and 30 kHz  | Data not available | 300-400            | HP-300 Hz, LP-3000 Hz (60 Hz)              | 3: vertex (active), pinnae (reference and ground)                                    | Data not available |
| Turner and Larsen, 2016 [65]          | TDT                | directly to ear canal           | tone bursts/ 5 ms (2-1-2)                        | 29/s               | 95-5 dB SPL (in 10 dB)      | 8, 10, 12, 16, 20, 24 and 32 kHz | Data not available | 512                | HP-100 Hz, LP-3000 Hz (data not available) | 3: around the first cervical vertebra, the dorsal cranial midline, rear leg (ground) | Data not available |
| Bing et al. 2015 [33]                 | Data not available | free field (data not available) | click, noise (1 ms) and tone burst/ 3 ms (1-1-1) | Data not available | 100-0 dB SPL (in 5 dB)      | 1-50 kHz                         | Data not available | 64-256             | Data not available                         | 3: vertex (active), mastoid (reference), back (ground)                               | Data not available |
| Zheng et al. 2015 [59]                | Data not available | directly to ear canal           | tone burst/ 5 ms (2-1-2)                         | 50/s               | 100-20 (in 20, 10 and 5 dB) | 8, 16, 20, and 32 kHz            | Data not available | Data not available | Data not available                         | 3: vertex (active), mastoid (reference), occiput (ground)                            | Data not available |
| Zheng, McPherson and Smith, 2014 [58] | Data not available | directly to ear canal           | tone burst/ 5 ms (2-1-2)                         | 21/s               | 90-0 dB SPL (in 5 dB)       | 8,16,20 and 32 kHz               | Data not available | Data not available | Data not available                         | 3: vertex (active), mastoid (reference), occiput (reference)                         | Data not available |
| Laundrie and Sun, 2014 [38]           | TDT                | Data not available              | tone burst/ 5 ms (1-3-1)                         | 21/s               | 80-0 dB SPL (in 10 dB d)    | 6, 12, 16 and 20 kHz             | Data not available | Data not available | HP-100 Hz, LP-3000 Hz (data not available) | 3: surgically implanted chronic electrode (no details)                               | Data not available |

|                           |                    |                                                 |                                         |                    |                                                         |                                  |                    |                    |                                            |                                                                         |                                                    |
|---------------------------|--------------------|-------------------------------------------------|-----------------------------------------|--------------------|---------------------------------------------------------|----------------------------------|--------------------|--------------------|--------------------------------------------|-------------------------------------------------------------------------|----------------------------------------------------|
| Ropp et al. 2014 [84]     | TDT                | directly to ear canal                           | tone burst/ 5 ms (0.5-4-0.5)            | 30/s               | 60- -20 dB SPL (Data not available)                     | 2.5-40 kHz                       | Data not available | 300                | HP-300 Hz, LP-3000 Hz (data not available) | 3: vertex (active), mastoid (reference), ipsilateral leg (ground)       | maintaining body temperature at 37°C (heating pad) |
| Ruttiger et al. 2013 [60] | Data not available | free field: 3 cm lateral to the animal's pinna  | click and tone burst/ 5 ms (1-3-1)      | 10/s or 80/s       | click: 0-90 dB SPL, tone burst: 20-100 dB SPL (in 5 dB) | 1-45 kHz                         | alternating        | 64-256             | HP-200 Hz, LP-5000 Hz (data not available) | 3: vertex (active), tested ears (reference) contralateral pina (ground) | Data not available                                 |
| Pace and Zhang, 2013 [64] | TDT                | directly to ear canal                           | click and tone burst/ 10 ms (0.5-9-0.5) | 50/s               | 80-5 dB peak SPL (in 5 dB)                              | 8, 12, 16 and 28 kHz             | Data not available | 300-400            | HP-300 Hz, LP-3000 Hz (60 Hz)              | 3: vertex (active), ipsi and contr-pinnas (reference and ground)        | Data not available                                 |
| Singer et al. 2013 [71]   | Data not available | open field: 3 cm lateral to the animal's pinna  | click                                   | 10/s               | 100-0 dB SPL (in 5 dB)                                  | < 4 kHz                          | alternating        | 64-256             | HP-200 Hz, LP-5000 Hz (data not available) | 3: vertex (active), ear (reference), back (ground)                      | Data not available                                 |
| Brozoski et al. 2012 [63] | TDT or IHS         | open field: 10 cm in front of the animal's head | click and tone burst/ 10 ms (0.5-9-0.5) | Data not available | 90-0 db SPL (in 5 dB)                                   | 8, 10, 12, 16, 20, 24 and 32 kHz | Data not available | 512                | HP-100 Hz, LP-3000 Hz (Data not available) | 3: vertex (active), mastoid (reference), left front paw (ground)        | Data not available                                 |
| Zheng et al. 2012 [70]    | Data not available | directly to ear canal                           | tone burst/ 5 ms (2-1-2)                | 50/s               | 80-10 db SPL (in 5 dB)                                  | 8, 16 and 20 kHz                 | Data not available | Data not available | Data not available                         | 3: vertex (active), mastoid (reference), back (ground)                  | Data not available                                 |
| Zheng et al. 2012 [57]    | Data not available | Data not available                              | tone burst/ 5 ms (2-1-2)                | 50/s               | 90-0 db SPL (in 5 dB)                                   | 8,16 and 20 kHz                  | Data not available | Data not available | Data not available                         | 3: vertex (active), mastoid (reference), occiput (ground)               | Data not available                                 |
| Zheng et al. 2011 [56]    | Data not available | directly to ear canal                           | tone burst/ 5 ms (2-1-2)                | 50/s               | 80-10 dB SPL (in 5 dB)                                  | 8, 16 and 20 kHz                 | Data not available | Data not available | Data not available                         | 3: vertex (active), mastoid (reference), occiput (ground)               | Data not available                                 |
| Wang et al. 2009 [66]     | IHS                | Data not available                              | click and tone burst/ 5ms (2.5-0-2.5)   | 50/s               | 80-0 dB SPL (in 10 dB)                                  | 4, 10, 16, 20, 24 and 32 kHz     | Data not available | 1024               | HP-100 Hz, LP-3000 Hz (data not available) | 3: vertex (active), mastoid (reference), hind leg (ground)              | Data not available                                 |

|                          |     |                       |                                                  |                    |                                    |                          |                    |         |                               |                                                                         |                                                                                         |
|--------------------------|-----|-----------------------|--------------------------------------------------|--------------------|------------------------------------|--------------------------|--------------------|---------|-------------------------------|-------------------------------------------------------------------------|-----------------------------------------------------------------------------------------|
| Ouyang 2017 (39)         | TDT | directly to ear canal | click and tone burst/ (data not available)       | Data not available | 100- 5 dB SPL (in 5 dB)            | 8, 12, 16, 20 and 28 kHz | Data not available | 300-400 | HP-300 Hz, LP-3000 Hz (60 Hz) | 3: vertex (active), pinna (reference) contr- temporal muscle (ground)   | warm blanket to sustain the body temperature                                            |
| Mahmood et al. 2014 [40] | TDT | directly to ear canal | click and tone burst/ 10 ms (data not available) | Data not available | 90 -10 dB SPL (data not available) | 8,12,16,20 and 28 kHz    | Data not available | 300-400 | HP-300 Hz, LP-3000 Hz (60 Hz) | 3: vertex (active), ipsi- and contr- pinnas (reference and ground)      | warming blanket connected to a thermostatic controller to maintain body temperature     |
| Mao et al. 2012 [41]     | TDT | Data not available    | click                                            | 50/s               | 80-5 dB peSPL (in 5 dB)            | <4 kHz                   | Data not available | 300     | HP-300 Hz, LP-3000 Hz (60 Hz) | 3: vertex (active), pinna (reference) contr- temporaris muscle (ground) | a warming blanket connected to a homeothermic control unit to maintain body temperature |

**Abbreviations:** LP, low pass filter; HP, high pass filter; TDT, Tucker-Davis Technologies; HIS, *Intelligent Hearing Systems*; ipsi, ipsilateral; contr, contralateral.
